# Supplementary material
Source: publisher figshare collection journal article supplement (https://springernature.figshare.com/ndownloader/files/15067685)
Supplement: Supplementary file 1 [file 15067685]

**Annex- 1**

Workflow in the data collection by phase of asylum procedure from the arrival of immigrants to the second instance decision.


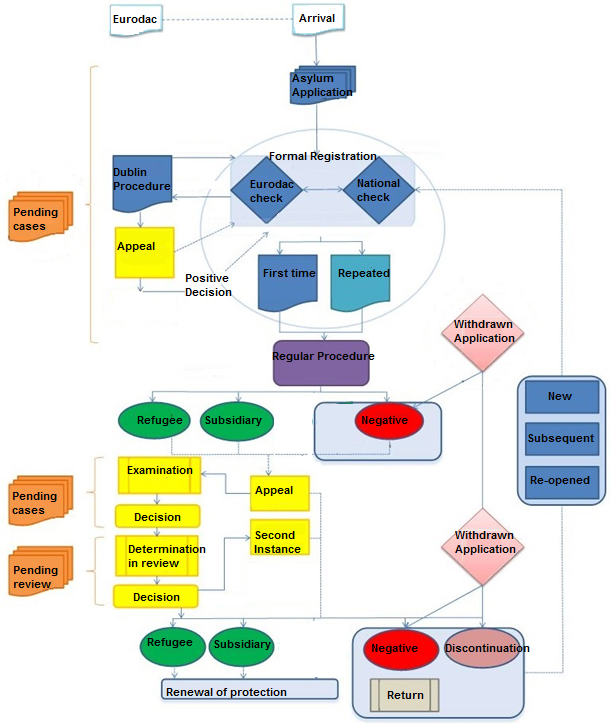


Asylum-related data collections in Italy
